# Supplementary material for: Variation in Craniomandibular Morphology and Sexual Dimorphism in Pantherines and the Sabercat Smilodon fatalis
Source: PLoS One. 2012 Oct 26;7(10):e48352. doi: 10.1371/journal.pone.0048352 (PMC3482211; doi:10.1371/journal.pone.0048352)

Supplementary figure S1.

Skull of Asiatic lion (*Panthera leo persica*; ♂, BM31.1.5.1) in lateral, dorsal and ventral views; and mandible of leopard (*P. pardus melas*; ♂, CN26), illustrating the measurements taken for morphometric analysis, only some of which proved to be sexually dimorphic when analysed as ratios to CBL or ML, as appropriate. 1, anteroposterior width of C1 at alveolus; 2, facial length; 3, dorsoventral height of skull posterior to C1; 4, dorsoventral height of skull at the P3/P4 junction; 5, anterior height of zygomatic arch; 6, posterior height of zygomatic arch posterior to postorbital process; 7, anteroposterior distance from preglenoid process to occipital condyle; 8, anteroposterior length of sagittal crest; 9, lateromedial width of snout; 10, interorbital width; 11, postorbital process width; 12, postorbital constriction width; 13, lateromedial width of braincase; 14, lateromedial width of incisor arcade; 15, lateromedial width between C1; 16, lateromedial width of palate across center of P3 paracone; 17, lateromedial width of palate across carnassial notch of P4; 18, condylobasal skull length (CBL); 19, length of palate; 20, lateromedial width of pterygoid palate; 21, lateromedial width across zygomatic arches; 22, lateromedial width across mastoid processes; 23, lateromedial width across occipital condyles; 24, mandible length (ML); 25, inlever moment arm for the *m. temporalis* (MAT); 26, inlever moment arm for the *m. masseter* (MAM); 27, dorsoventral height of mandible posterior to M1. Additionally, the dorsoventral height of the mastoid process, the anteroposterior crown lengths of P3, P4, P4, and M1 were measured. Scale bars equal 10 cm.


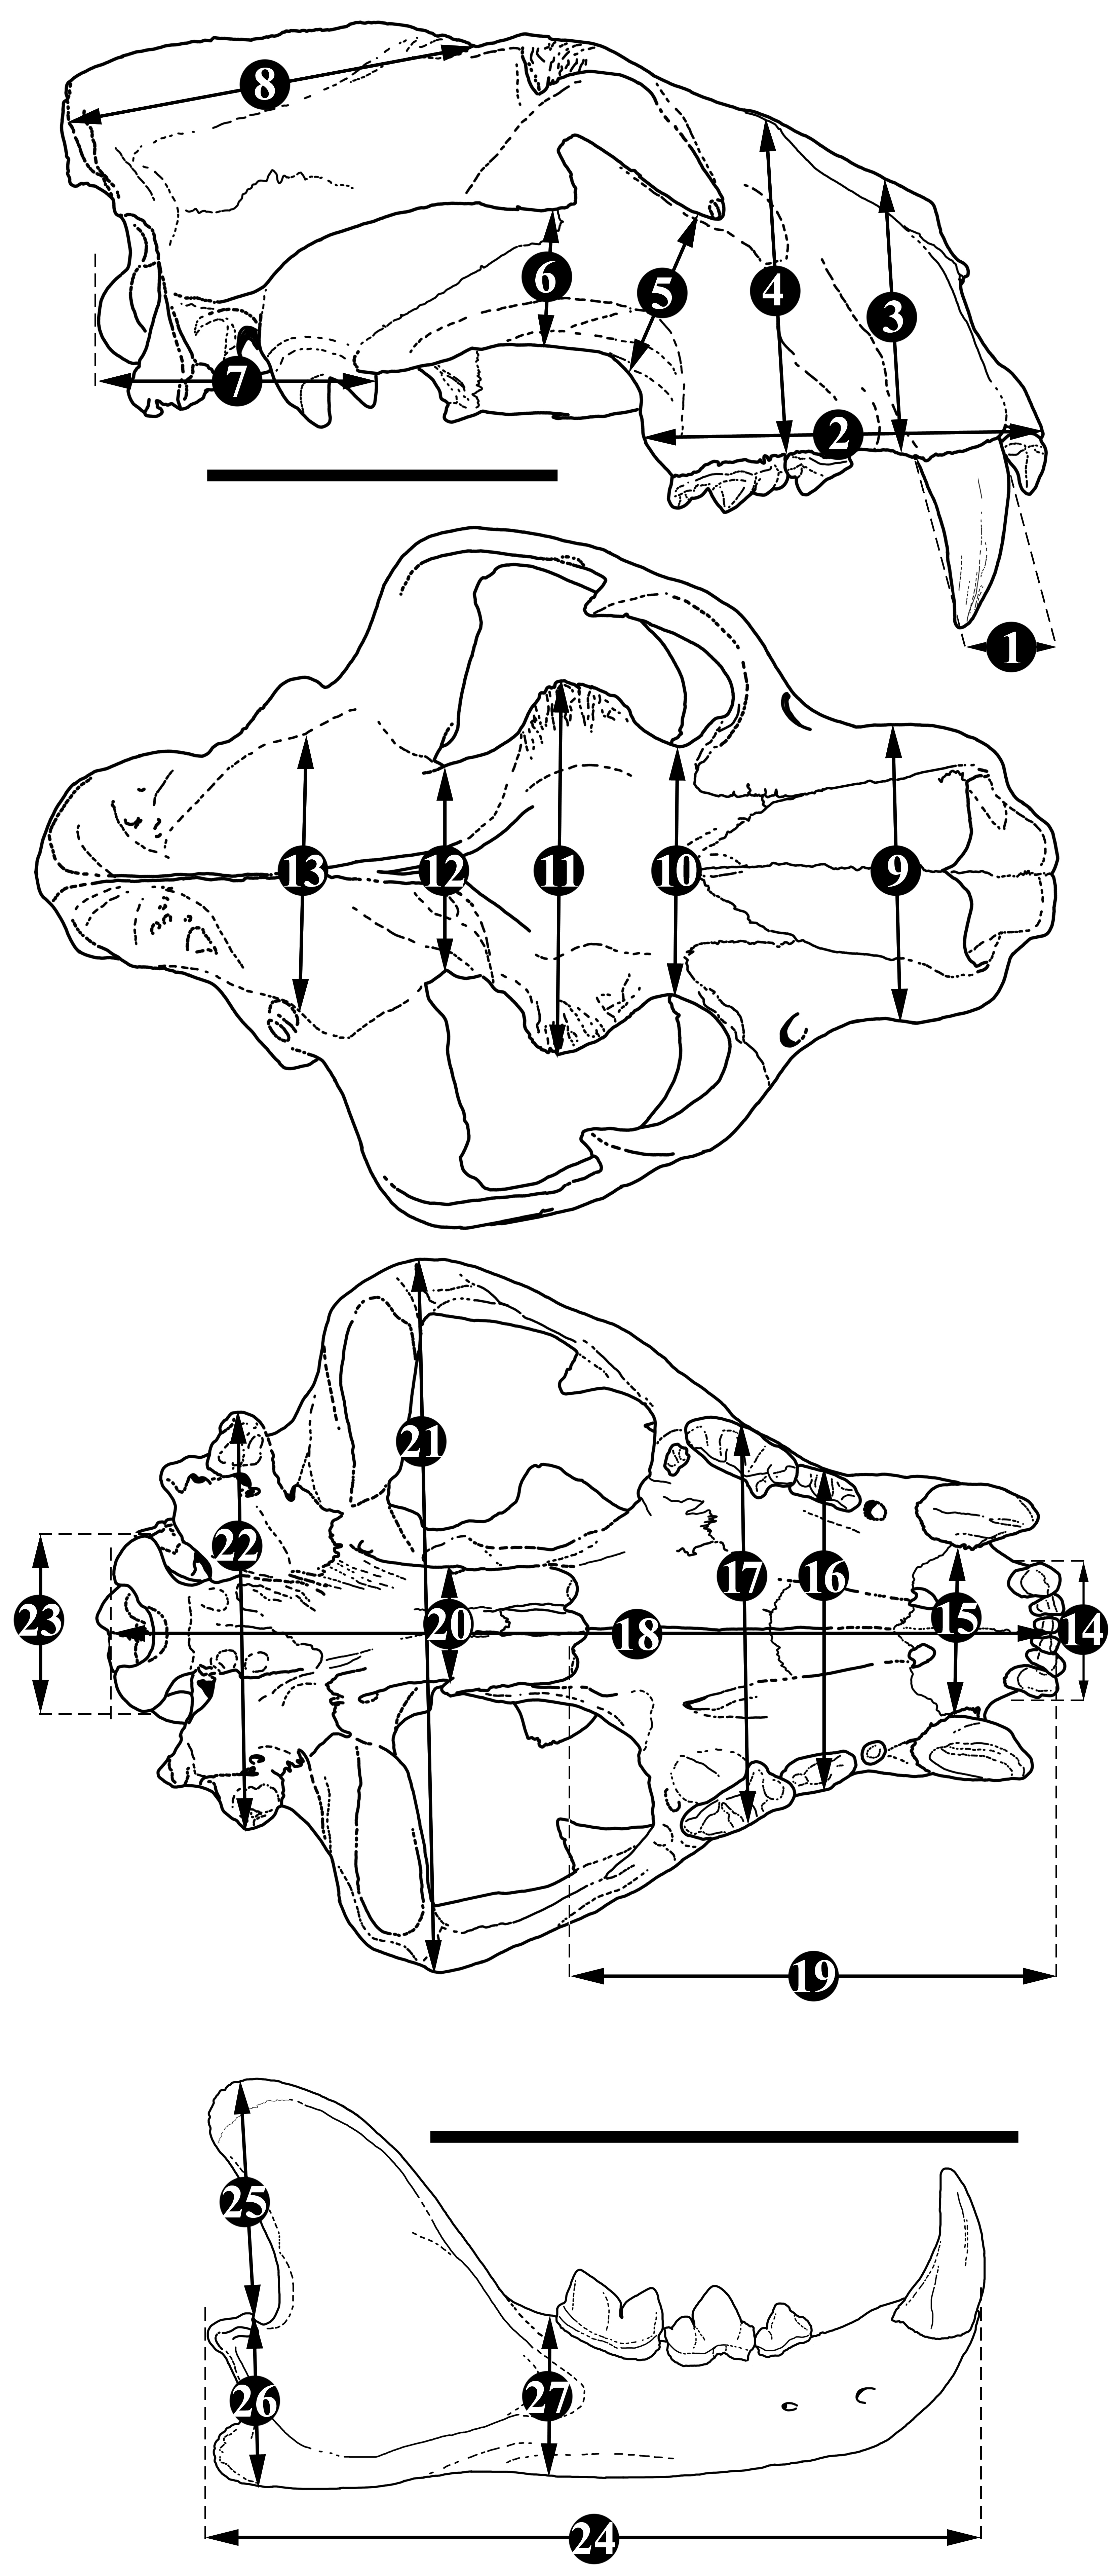


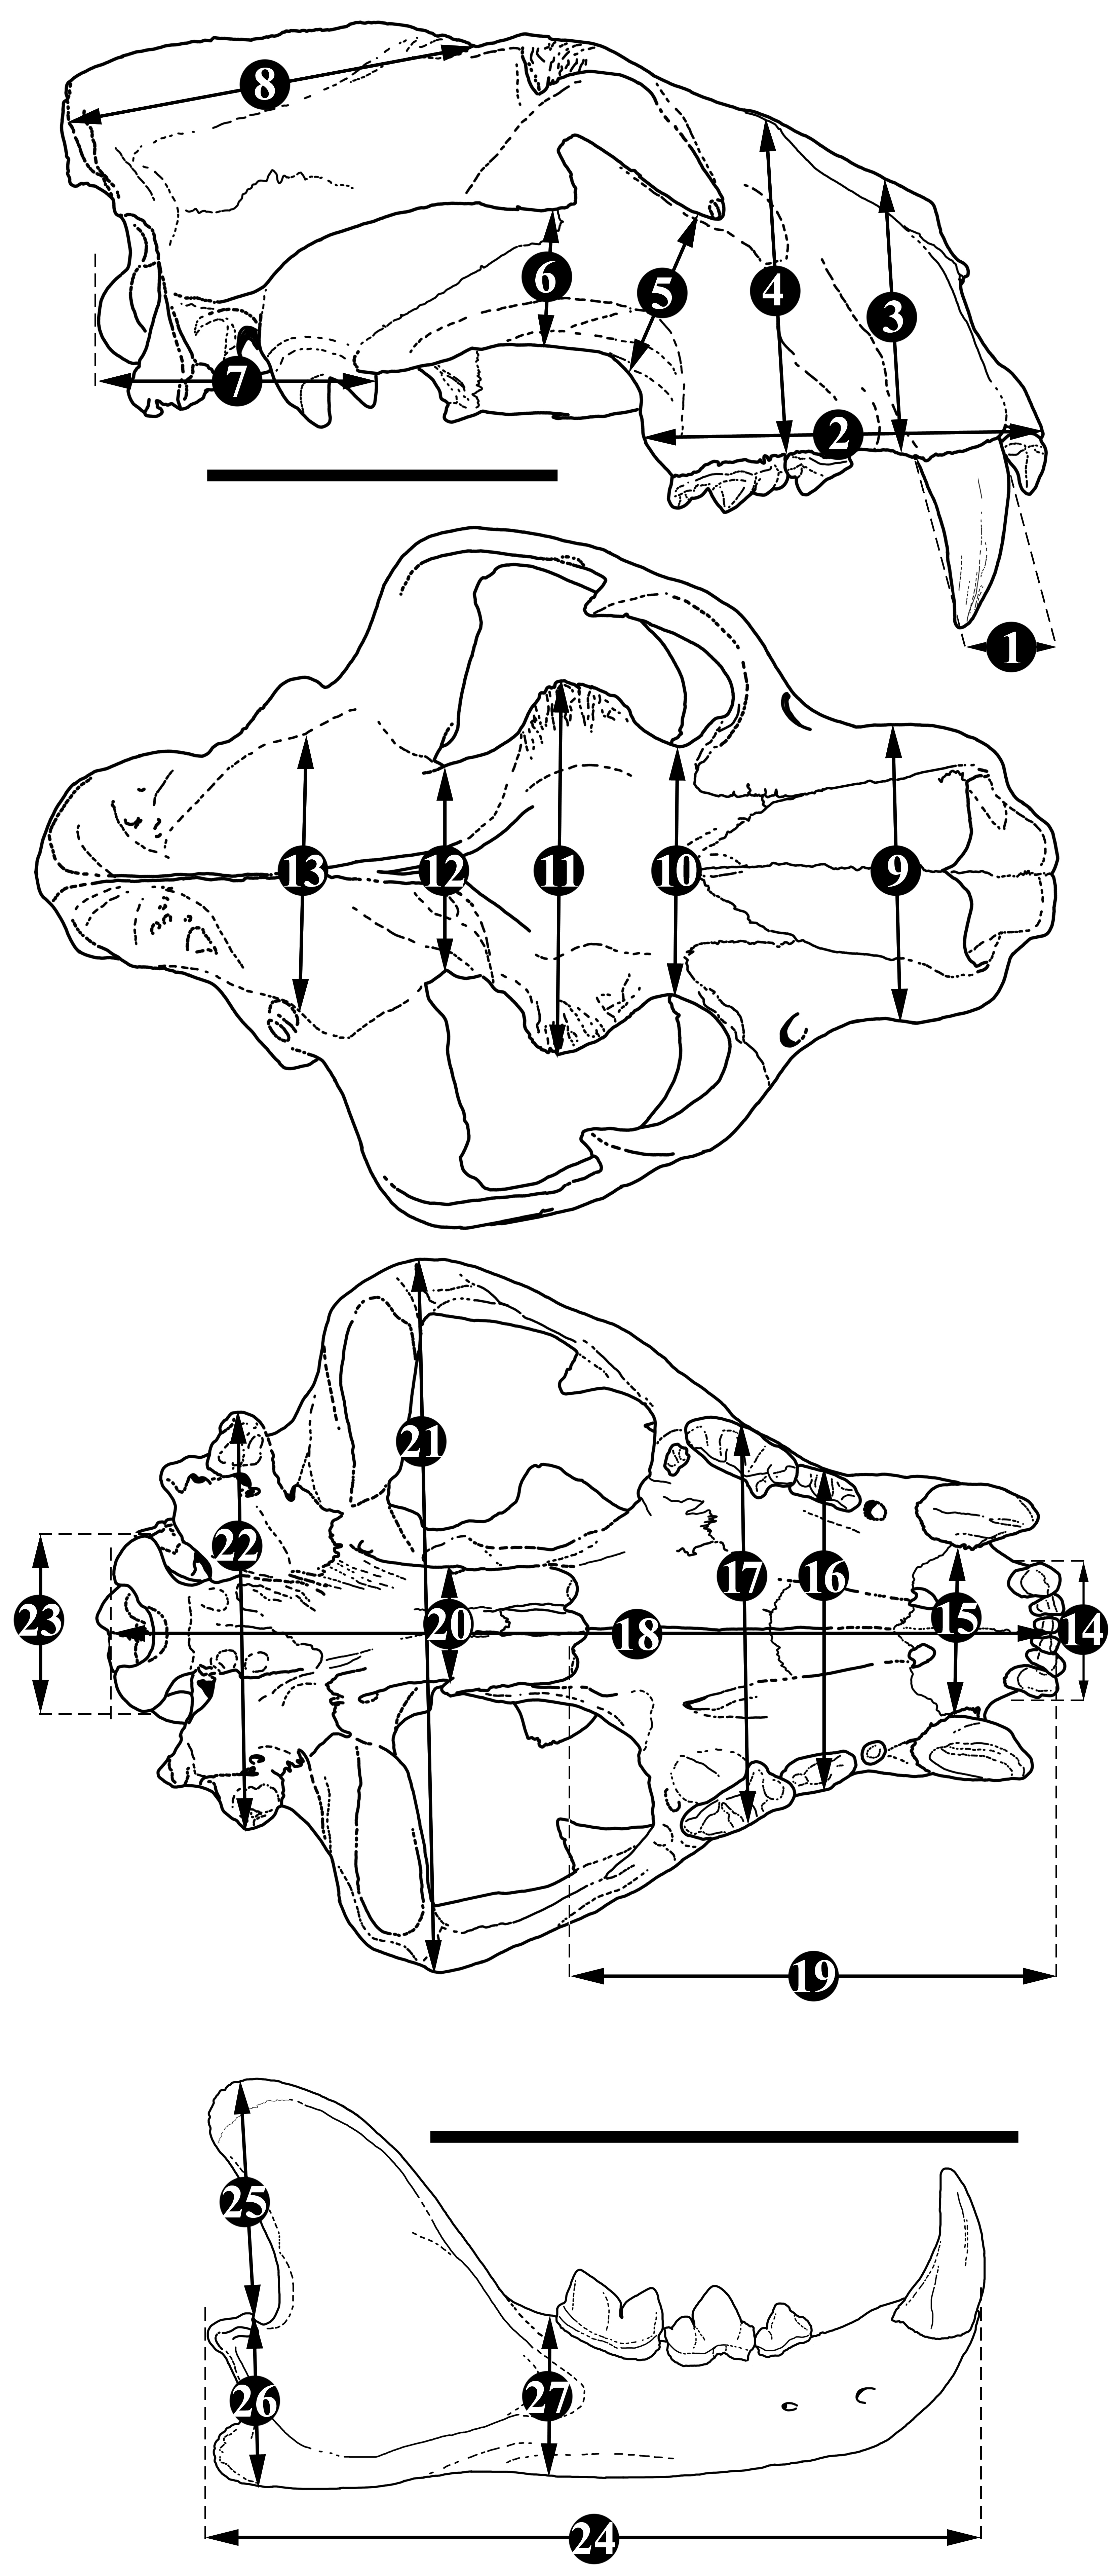

Supplement: Figure S1 — Skull of Asiatic lion ( Panthera leo persica ; ♂, BM31.1.5.1) in lateral, dorsal and ventral views; and mandible of leopard ( P. pardus melas ; ♂, CN26), illustrating the 27 of the 32 measurements taken for morphometric analysis. (DOC) [file pone.0048352.s001.doc]
